1 **The early development and physiology of *Xenopus laevis* tadpole lateral line**  
2 **system**

3

4 **Running title:** *Xenopus* tadpole lateral line system

5

6 Valentina Saccomanno, Heather Love, Amy Sylvester, Wen-Chang Li\*

7 \* Correspondence, School of Psychology and Neuroscience, University of St Andrews, UK, wl21@st-  
8 andrews.ac.uk

9

10 **Key words:** lateral line, *Xenopus laevis*, tadpole, afferent, efferent, hindbrain

11

12 **Summary statement:**

13 Activating tadpole anterior lateral line evokes escape responses followed by swimming and  
14 halts ongoing swimming. The afferent and efferent activities and sensory interneuron  
15 locations in the hindbrain are reported.

16

17 **Abstract**

18 *Xenopus laevis* has a lateral line mechanosensory system throughout its full life cycle. Previous  
19 studies of the tadpole lateral line system revealed that it may play a role in escape behaviour. In this  
20 study, we used DASPEI staining to reveal the location of tadpole lateral line neuromasts. Destroying  
21 these neuromasts with neomycin resulted in loss of escape responses in tadpoles. We then studied  
22 the physiology of anterior lateral line in immobilised tadpoles. Activating the neuromasts behind one  
23 eye could evoke asymmetrical motor nerve discharges when the tadpole was resting, suggestive of  
24 turning/escape, followed by fictive swimming. When the tadpole was already producing fictive  
25 swimming however, anterior lateral line activation reliably led to the termination of swimming. The  
26 anterior lateral line had spontaneous afferent discharges at rest, and when activated showed typical  
27 adaptation. There were also efferent activities during tadpole swimming, the activity of which was  
28 loosely in phase with ipsilateral motor nerve discharges, implying modulation by the motor circuit from  
29 the same side. Calcium imaging experiments located sensory interneurons in the primary anterior  
30 lateral line nucleus in the hindbrain. Future studies are needed to reveal how sensory information is  
31 processed by the central circuit to determine tadpole motor behaviour.

32

## 1 Introduction

2 Aquatic vertebrates including fish and Anura use the distributed mechanosensory lateral line (LL)  
3 system to sense hydrodynamic disturbances (Bleckmann H and Zelick R, 2009; Coombs S and Zaidi  
4 ZH, 2012; Kroese AB et al., 1978; Montgomery JC et al., 1997; Stewart WJ et al., 2013). The LL system  
5 provides an important sensory mode for animals to conduct rheotaxis (facing into and swimming  
6 against a current) (Akanyeti O et al., 2016; Haehnel-Taguchi M et al., 2018; Montgomery JC, Baker CF  
7 and Carton AG, 1997; Oteiza P et al., 2017; Simmons AM et al., 2004), predator avoidance and  
8 escape (McHenry MJ et al., 2009; Roberts A et al., 2009; Stewart WJ, Cardenas GS and McHenry MJ,  
9 2013) and prey detection (Claas B and Munz H, 1996; Nagiel A et al., 2008). There are three types of  
10 LL receptor: mechanosensory neuromasts, pit organs (Northcutt RG, 1992) and electroreceptive  
11 ampullary organs. Superficial neuromasts, embedded in the epidermis, are found in both amphibians  
12 and fish, whereas canal neuromasts, protected in grooves, are exclusive to fish (Bleckmann H and  
13 Zelick R, 2009; Northcutt RG, 1992; Quinzio S and Fabrezi M, 2014). Hair cells in the centre of  
14 neuromasts act as mechanotransducers (Northcutt RG, 1992) while kinocilia embedded inside the  
15 cupula bend with water current flow, allowing the detection of water current directions (Nagiel  
16 A, Andor-Ardo D and Hudspeth AJ, 2008; Strelhoff D and Honrubia V, 1978).

17 The larval Zebrafish LL system has seven nerves: the supraorbital, infraorbital, mandibular, middle,  
18 opercular, otic, middle, and occipital LL nerves (Raible DW and Kruse GJ, 2000). Several studies  
19 have been carried out in zebrafish larvae to test the role of the LL system behaviourally. The LL  
20 system has been shown to be critical in sensing predation (McHenry MJ, Feitl KE, Strother JA and Van  
21 Trump WJ, 2009; Stewart WJ, Cardenas GS and McHenry MJ, 2013), predator evasion (Olszewski J et  
22 al., 2012) and rheotaxis (Oteiza P, Odstrcil I, Lauder G, Portugues R and Engert F, 2017; Suli A et al.,  
23 2012). LL physiology has been studied by directly recording hair cells (Corey DP and Hudspeth AJ,  
24 1983; Lv C et al., 2016; Olt J et al., 2016; Ricci AJ et al., 2013) and primary afferent neurons (Glowatzki  
25 E and Fuchs PA, 2002; Keen EC and Hudspeth AJ, 2006; Liao JC, 2010; Liao JC and Haehnel M,  
26 2012).

27 Arrangement of the LL system is largely conserved in amphibians (Schlosser G, 2002). All anuran  
28 tadpoles have two orbital and three mandibular LL nerves, as well as trunk and tail LL nerves (Quinzio  
29 S and Fabrezi M, 2014). The orbital and trunk LL nerves are largely conserved between anuran  
30 tadpole species, whilst the mandibular LL nerve exhibits more interspecies variation (Quinzio S and  
31 Fabrezi M, 2014). Fish possess an LL system throughout their lifecycle, whereas presence and  
32 retention of the LL system in amphibians is dependent on the extent to which they are aquatic. The  
33 size of neuromast, and number and organisation of hair-cells, varies between species of Anura  
34 (Quinzio S and Fabrezi M, 2014). In *Xenopus*, neuromasts first appear in stage 32 tadpoles  
35 (Nieuwkoop PD and Faber J, 1956; Roberts A, Feetham B, Pajak M and Teare T, 2009). Both receptor  
36 organs and sensory neurons of the LL develop from progenitor cells deposited by placodes  
37 (Schlosser G, 2002; Schlosser G and Northcutt RG, 2000). The five LL placodes of *Xenopus*;  
38 anterodorsal, anteroventral, middle, supratemporal, and posterior; derive from the dorsolateral  
39 placode (Schlosser G and Northcutt RG, 2000). Each LL placode generates a single LL nerve, as well

1 as at least one sensory ridge or migrating primordia, which differentiates into neuromasts (Schlosser  
2 G, 2002). The ganglion cells are produced first, followed by elongated sensory ridges, and finally  
3 neuromasts (Schlosser G and Northcutt RG, 2000). *Xenopus* also retains the LL system through  
4 metamorphosis into adulthood (Shelton PM, 1970;Strelieff D and Honrubia V, 1978). The adult  
5 *Xenopus* has ~200 neuromasts in lines over its head and body, organised into 'stitches' of 3-12  
6 neuromasts. Each neuromast comprises 30-60 ciliated hair-cells covered by a gelatinous cupula  
7 (Strelieff D and Honrubia V, 1978). In early tadpole stages however, it is thought that the cupula has  
8 not yet formed (Roberts A,Feetham B,Pajak M and Teare T, 2009). Activation of the lateral line  
9 system in tadpoles can initiate escape responses followed by swimming (Roberts A,Feetham B,Pajak  
10 M and Teare T, 2009) and rheotactic behaviour in older tadpoles (Haehnel-Taguchi M,Akanyeti O and  
11 Liao JC, 2018;Simmons AM,Costa LM and Gerstein HB, 2004).

12 The spinal cord of *Xenopus laevis* tadpoles at stage 37/38 is one of the simplest and arguably best  
13 understood among all vertebrates (Roberts A et al., 2012;Roberts A et al., 2010). Tadpole sensory  
14 modalities are fairly limited at stage 37/38. Only mechanosensory systems and the light-sensing  
15 pineal eyes are functional. The LL system of the hatchling *Xenopus* tadpole provides a very simple  
16 sensory system for water current detection (Roberts A,Feetham B,Pajak M and Teare T, 2009). Other  
17 senses including ocular vision, hearing, taste and pain are not developed. The simplicity of tadpole  
18 sensory and motor systems presents the animal as an excellent model for studying sensory  
19 information integration and motor decision-making (Koutsikou S et al., 2018;Roberts A et al., 2019). In  
20 this study, we investigated the neurophysiology of the tadpole LL system.

## 21 **Materials and Methods**

22 Mating between pairs of adult *Xenopus laevis* was induced regularly by injections of human chorionic  
23 gonadotropin (HCG, 1000 U/ml, Sigma, UK) into the dorsal lymph sacs. Procedures for HCG  
24 injections comply with UK Home Office regulations. All experiment procedures on tadpoles were  
25 approved by the Animal Welfare Ethics Committee (AWEC) of the University of St Andrews.

26 To visualise the LL neuromasts in tadpole skin, 2-[4-(dimethylamino)styryl]-N-ethylpyridinium iodide  
27 (DASPEI), was obtained from Sigma- Aldrich UK. Small batches of stock were made up in distilled  
28 H<sub>2</sub>O prior to experiments and stored at 4°C in darkness to prevent photobleaching. An assay by  
29 Pisano, et al. (Pisano GC et al., 2014) was adapted for use in the present study. A solution of 0.4  
30 mg/ml DASPEI was made in distilled water. Before staining, the stock solution was diluted with equal  
31 volume of saline (concentrations in mM: NaCl, 115; KCl, 3; CaCl<sub>2</sub>, 2; NaHCO<sub>3</sub>, 2.4; MgCl<sub>2</sub>, 1; HEPES,  
32 10; pH adjusted to 7.4 with NaOH). Tadpoles were placed in the final 0.2 mg/ml solution for 30  
33 minutes in darkness on a rocking bed, then placed in a saline bath for 5 minutes to wash off excess  
34 dye. To identify and count stained neuromasts, a stereomicroscope was modified with the addition of  
35 a barrier filter and monochromatic LED light source at 450nm to allow fluorescent imaging. Tadpoles  
36 were placed in saline between two recessed slides. Both sides of the head and trunk were observed  
37 and photographed using an eyepiece camera and DinoCapture imaging software (Dino-Lite Europe).  
38 To enhance visualisation of the neuromasts, the original fluorescent microscopy images were

1 converted to grey scale images by enhancing the red and yellow colour channels (Fig.1A). All images  
2 were edited using FIJI for ImageJ or Corel PHOTO PAINT, and neuromast measurements were also  
3 taken with FIJI (Schindelin J et al., 2012). All experiments were performed on newly hatched pre-  
4 feeding *Xenopus laevis* larvae between developmental stages 32-42, defined by Nieuwkoop and  
5 Faber (Nieuwkoop PD and Faber J, 1956).

6 Neomycin was obtained from Sigma-Aldrich UK in solution (10 mg/ml in 0.9% NaCl solution) and  
7 stored at 4°C. To destroy the neuromast hair cells, tadpoles were placed in a 3 µg/ml solution of  
8 neomycin in saline for 30 minutes. Tadpoles were then imaged to confirm neuromast ablation  
9 (Roberts A, Feetham B, Pajak M and Teare T, 2009).

10 Before testing tadpole responses to suction, the animal tail was touched with a hair to ensure it was  
11 capable of swimming normally. A modified water pump was used to apply suction through plastic  
12 tubing (inner diameter: ~ 1.5 mm), with the end of the tube placed ~ 1 mm from the head of the  
13 tadpole. The escape response of each tadpole was tested five times, with a rest period of three  
14 minutes between trials. For motor nerve (m.n.) recordings, tadpoles were immobilised by  $\alpha$ -  
15 bungarotoxin at 10 µM for 20-30 minutes and dissections were made to expose the muscle cleft. A  
16 smaller nozzle with a diameter of ~ 120 µm was placed ~ 150-200 µm above the left eyecup. The  
17 suction level was set by manually changing the volume of air trapped in a stock bottle of 500 ml using  
18 a 50ml syringe. Suction level was calculated based on Boyle's law ( $P_1 \times V_1 = P_2 \times V_2$ ) and expressed as  
19 the difference from normal atmosphere pressure in KPa. The application of suction for the duration of  
20 0.5-10 seconds was controlled by a Toohy spritzer (Toohy Company, Fairfield, NJ, USA), the valve  
21 of which connects/disconnects the bottle with the suction nozzle. Extracellular recordings of motor  
22 nerve activity were made using methods described previously (Li WC et al., 2017). Briefly  
23 anaesthetised and then immobilised tadpoles were dissected to remove the yolk belly and expose the  
24 swimming myotomes in the trunk region. Glass electrodes filled with saline were placed on one or two  
25 muscle clefts (normally between the 5<sup>th</sup> and 6<sup>th</sup> myotomes). Recording of anterior LL nerve (aLLN)  
26 activity was carried out by positioning one glass electrode on the cut nerve end with gentle suction (~  
27 200 Pa). LED dimming, electrical skin stimulation and suction application were all controlled by TTL  
28 pulses configured in the sampling software Signal, through the power 1401 board (CED, Cambridge,  
29 UK). The suction was monitored using a fluid flow sensor to monitor if the suction nozzle was clogged  
30 during experiments.

31 In order to image the intracellular calcium signals in brainstem neurons, some ependymal cells inside  
32 the brainstem were removed to expose neuronal somata by dissection (Li WC, Zhu XY and Ritson E,  
33 2017). Tadpoles were left in 5 µM Fluo-4 AM saline solution for ~20 minutes in darkness. After resting  
34 the tadpole for about 20 minutes, fluorescence images were captured at 5 Hz using x10 or x20 water  
35 immersion lenses with a Neo5.5 CMOS camera and the Andor Solis software (Oxford Instruments,  
36 UK).

1 Some processing of the m.n. recordings was conducted in Dataview, courtesy of Dr William Heitler at  
2 the University of St Andrews. All data sets were examined for normality first. Non-parametric statistical  
3 methods were used for those without normal distributions using IBM SPSS.

#### 4 **Results**

##### 5 *DASPEI staining in control and after neomycin treatment*

6 We first aimed to count and locate the LL neuromasts using fluorescent DASPEI staining in live  
7 tadpoles at different developmental stages. No neuromast was visible at stage 32. Most neuromasts  
8 appeared as lone spots at stage 35 and 39 with some appearing to cluster together especially at  
9 stage 41. In the latter case, the number of separate dots in the clusters was often difficult to resolve  
10 and they were counted as one neuromast (Fig.1B). The mean neuromast count increased  
11 progressively, rising from  $7.6 \pm 2.46$  per tadpole at stage 35 to  $14.2 \pm 4.39$  at stage 39, and  $36.5 \pm$   
12  $10.02$  at stage 41 ( $n = 10$  tadpoles for each stage,  $p < 0.001$ , one way ANOVA, Fig.1C-D). The mean  
13 diameter of stained neuromasts also increased significantly over the stages examined (Figure 1E),  
14 from  $13.92 \pm 3.15 \mu\text{m}$  at stage 35, to  $17.12 \pm 2.71 \mu\text{m}$  at stage 39, and finally to  $20.72 \pm 3.9 \mu\text{m}$  at  
15 stage 41 ( $n = 15$  neuromasts for each stage,  $p < 0.001$ , one way ANOVA, Fig.1E). Until stage 39,  
16 neuromasts were only observed on the head, mostly arranged in a single line caudal to the eye. At  
17 stage 39, in some cases new neuromasts began to appear posterior to the original neuromast line  
18 (Figure 1A). By stage 41, neuromasts were observed surrounding the eye, extending to the dorsal  
19 area (Figure 1C). At this stage the posterior LL neuromasts also started to appear in a single line  
20 down the trunk, but never reaching the tail (Fig.1F).

21 We next tested tadpole responses to suction at rest at development stage 40. Stage 40 tadpoles had,  
22 on average, a  $61.8 \pm 4.2\%$  probability of escaping the suction applied ( $n = 11$  tadpoles, 5 trials each),  
23 i.e. they produced a C-bend of their trunk and then swam away from the suction nozzle, or turned  
24 inside the suction nozzle and swam out. In order to verify if this escape response was initiated by the  
25 activation of tadpole LL system, the aminoglycoside antibiotic, neomycin, was used to destroy the  
26 neuromasts. After exposing tadpoles to 3 mg/ml neomycin for 30 minutes, DASPEI staining did not  
27 label any neuromasts ( $n = 5$  tadpoles, Fig.1G). Neomycin-exposed tadpoles also lost their escape  
28 response to suction, i.e. they were passively sucked in the nozzle without motor responses like C-  
29 bend and swimming. Their escape probability decreased from  $60 \pm 6.3\%$  to 0% and showed no  
30 recovery 24 hours after transferring to normal saline (5 trials to each tadpole in every condition)  
31 although tadpoles responded to touch stimulation with swimming reliably (100%, 5 trials in each  
32 condition) immediately after neomycin treatment and after 24-hour rest period. After the 24-hour rest  
33 period, a mean of  $28 \pm 5.25$  neuromasts from both left and right sides were detected using DASPEI  
34 labelling for the second time ( $n = 5$  tadpoles), indicating some regeneration of the LL neuromasts. The  
35 location of these neuromasts was similar to that in control tadpoles but staining did not appear as  
36 intense (Fig.1G).

##### 37 *Activating the lateral line system in immobilised tadpoles*

1 Having located the neuromasts, a suction nozzle could be positioned in their vicinity to activate them  
2 and investigate the effect on tadpole motor outputs. We recorded tadpole motor outputs in  
3 immobilised tadpoles to determine whether we could replicate the escape response (Fig.2). The  
4 tadpole was pinned on its side onto the sylgard block in the recording dish, similar to the position  
5 tadpoles assume when they rest at the bottom of a petri dish. A nozzle with a diameter of  $\sim 120 \mu\text{m}$   
6 was placed within  $\sim 150\text{-}200 \mu\text{m}$  above the left eyecup and used to apply suction (0.5-10 seconds, -1  
7 to -7.5KPa).

8 Suction often elicited asymmetric motor responses between the two sides monitored with  
9 simultaneous left and right motor nerve recordings (Fig.2A). Using Dataview software, we first reset  
10 the baseline m.n. recording at 0 (de-meaning), rectified the traces and integrated the m.n. activity for  
11 the period starting from the onset of suction to the point when rhythmic m.n. bursts appeared (either  
12 synchrony or swimming, Fig.2B, (Li WC et al., 2014)). Assuming the activity between the two sides  
13 will be symmetrical during swimming, we normalised the amplitude of m.n. activity to the bursts during  
14 the first 15-20 swimming cycles. We then calculated the asymmetric index by dividing the normalised  
15 and integrated m.n. activity on the right side by that on the stimulated, left side. This was calculated  
16 for 5 suction-evoked responses and 5-8 spontaneous swimming episodes in each tadpole and  
17 averaged. There was a correlation between the control average asymmetric indices and those for  
18 suction (Spearman's rank correlation,  $p < 0.05$ , Fig.2C). The correlation coefficient of 0.562 suggests  
19 that animals that showed tendency to bend away from the suction side at the beginning of  
20 spontaneous swimming produced clearer escape response to suction. The average indices were  
21 higher in the case of suction ( $1.39 \pm 0.16$ ) than in control ( $1.01 \pm 0.08$ ,  $n = 16$  tadpoles, related sample  
22 Wilcoxon Signed rank test,  $p < 0.01$ , Fig.2D), suggesting the tadpole would initially bend its body  
23 away from the suction, followed by swimming.

24 We observed that when suction was applied in the middle of on-going swimming activity swimming  
25 was halted (Fig.3A, B). Normal swimming episodes were 10 – 41 seconds long ( $n=12$  tadpoles). We  
26 applied a 0.5 second suction when the swimming was about halfway through its episode in control  
27 conditions (8-12 trials in each tadpole). The suction reliably shortened swimming in 127 out of 131  
28 trials (independent sample t-test, all  $p < 0.05$ , Fig.3C) which lasted for  $1.32 \pm 0.16$  seconds after  
29 suction ended.

### 30 *The effects of electrical stimulation of the anterior lateral line nerve*

31 Activating the lateral system using suction was most effective when minimal dissection was made to  
32 the tadpoles. In order to study the neuronal pathways in the central nervous system that mediated  
33 these motor responses, we needed to open up the brainstem. We next tried to stimulate the anterior  
34 LL nerve (aLLN) to see if we could reproduce the motor response above. We cut the aLLN connecting  
35 to the head skin using a pair of fine scissors and used a stimulation electrode (diameter:  $\sim 60 \mu\text{m}$ ) to  
36 suck onto the severed end of aLLN. One to 20 stimulation pulses (0.5 -2ms in duration, 200-400 Hz)  
37 were used to excite the aLLN nerve. Following stimulation, swimming was initiated reliably but without  
38 clear prolonged one-sided bursts indicating an escape response (Fig.4B). Therefore, we did not

1 attempt to calculate the asymmetric indices. When stimulation was applied in the middle of on-going  
2 swimming, swimming could be stopped reliably (Fig.C, D), just as with the more natural local suction  
3 stimuli. Swimming after stimulation lasted for  $3.5 \pm 0.3$  s, much shorter than in control conditions ( $47.5$   
4  $\pm 5.4$ s,  $p < 0.001$ , paired t-test, 68 trials in 9 tadpoles).

#### 5 *Afferent and efferent aLLN activity*

6 We next recorded the afferent and efferent activities of the aLLN. aLLN was severed at its entry point  
7 to the hindbrain. A suction pipette with  $\sim 60$   $\mu$ m tip diameter sucked onto the cut end while  
8 maintaining the skin around the eye intact. A suction nozzle was placed close to the eyecup to  
9 activate the aLLN peripherals (typical duration: 7 seconds, Fig.5A, B). In most cases, multiple units  
10 were recorded often with similar amplitudes in their extracellular action potentials. To simplify  
11 analyses, we did not try to discriminate different units. Instead, we used these extracellular discharges  
12 to trigger events once they reached the threshold (arbitrarily set at  $\pm 5$  SD of the baseline, Fig.5B).  
13 Then we counted the number of events in each 0.5 second bin and averaged them across 14  
14 tadpoles. The average number of events was higher during the suction period than before or after  
15 suction ( $p < 0.01$ , related-samples Wilcoxon signed rank test). The latency from the start of suction  
16 flow to the first unitary discharge was  $19.7 \pm 1.1$  ms (13 trials in 13 tadpoles). The discharges to  
17 suction also showed typical adaptation with time (Fig.5C).

18 We removed the skin covering the left eyecup and cut the distal end of aLLN using a pair of fine  
19 scissors. The otic capsule was also exposed and removed, together with the trigeminal nerve. A  
20 pipette with a diameter of  $\sim 60$   $\mu$ m was used to suck onto the cut end to record aLLN efferent activity  
21 with m.n. activity recorded simultaneously (Fig.6A). Efferent activity was only recorded during  
22 swimming, which was initiated by dimming an LED light (Fig.6B). The efferent discharges were more  
23 reliable at the beginning of swimming episodes and became unreliable a few seconds after swimming  
24 was started (Fig.6C). The distribution of efferent discharge timing showed an in-phase peak with  
25 ipsilateral (left) m.n. bursts (Fig.6D).

#### 26 *Locating lateral line sensory interneurons using calcium imaging*

27 In order to trace the LL pathways in the central nervous system, we used calcium imaging to locate  
28 the sensory interneurons in the hindbrain on the stimulated side. We opened the dorsal roof of the  
29 brain stem and removed some ependymal cells lining the inside wall of hindbrain and midbrain so  
30 Fluo-4 AM could be loaded into the exposed neurons. After this dissection, the stub of any cut aLLN  
31 would be obscured by the hindbrain which opened up sideways when viewed from the top. This made  
32 it impractical to electrically stimulate the aLLN. Instead, we positioned a suction nozzle with a tip  
33 diameter of  $\sim 120$   $\mu$ m close to the left eyecup to activate aLLN. A 10x water immersion objective was  
34 used so a large area of hindbrain and midbrain could be imaged to screen active neurons.  
35 Simultaneous m.n. nerve and suction flow recordings were carried out (Fig.7).

36 In 6 tadpoles, we located neurons with increased calcium activities immediately after suction (0.5 s  
37 duration) in the very dorsal hindbrain region where the aLLN entered the hindbrain (49 Neurons, e.g.  
38 see red and pink traces in Fig.7C). In two of the six tadpoles, suction did not evoke any motor

1 response but still activated 6 and 5 neurons in this region. In three of the six tadpoles where  
2 spontaneous swimming was also monitored, 13 out of the 35 aLLN neurons were also active at the  
3 start of spontaneous swimming. However, such activity did not last through the swimming episode  
4 (pink traces in Fig.7C). These data suggest that the identified 49 neurons are sensory interneurons for  
5 the aLLN.

## 6 **Discussion**

7 In this study, we have examined the basic physiology of aLLN in immobilised tadpoles after locating  
8 the neuromasts using DASPEI labelling. The results showed that the aLLN plays a role in potential  
9 tadpole escape behaviour, initiation of swimming and termination of on-going swimming.

10 In adult amphibians, each LL stitch is innervated by two myelinated afferent fibres (Kroese AB, Van  
11 der Zalm JM and Van den Bercken J, 1978; Nagiel A, Andor-Ardo D and Hudspeth AJ, 2008; Strelhoff D  
12 and Honrubia V, 1978), projecting along the lateral spinal tract to a specialized hindbrain nucleus  
13 (Roberts A, Feetham B, Pajak M and Teare T, 2009; Schlosser G, 2002). Each afferent is excited by  
14 one orientation of hair-cell, and inhibited by the other (Kroese AB, Van der Zalm JM and Van den  
15 Bercken J, 1978; Obholzer N et al., 2008; Strelhoff D and Honrubia V, 1978). Afferent neurons of the  
16 head receptors project to the aLLN, and trunk receptors to the posterior LL nerve (Northcutt RG,  
17 1992).

18 What are the primary functions for the LL system in young *Xenopus* tadpoles? Rheotaxis is  
19 particularly important in river-dwelling species and those inhabiting turbulent water to prevent being  
20 swept away.  $\text{CoCl}_2$  ablates superficial neuromasts, significantly increasing the current threshold for  
21 rheotaxis in fish (Montgomery JC, Baker CF and Carton AG, 1997), and impairing the ability of older  
22 *Xenopus* tadpoles to orient to a current source (Simmons AM, Costa LM and Gerstein HB, 2004). In  
23 tadpoles, directional orientation (facing into the current) is observed at stages 37-46 (Nieuwkoop PD  
24 and Faber J, 1956; Simmons AM, Costa LM and Gerstein HB, 2004), but positive rheotaxis (actively  
25 swimming against the current) is not observed until stage 47 (Nieuwkoop PD and Faber J,  
26 1956; Roberts A, Feetham B, Pajak M and Teare T, 2009). The hatchling *Xenopus* tadpole at stage  
27 37/38 is inactive 99% of the time, in comparison to constant swimming at later stages. This suggest  
28 that rheotaxis may not be a primary function of the LL system. The initial asymmetrical motor nerve  
29 bursts recorded in immobilised tadpoles could signal a turning in body orientation. This turning  
30 behaviour is necessary for aquatic prey animals to swim against water flow generated by inertial  
31 suction-feeding predators (Carreno CA and Nishikawa KC, 2010). In zebrafish, this is typically the C-  
32 start escape response, allowing larvae to escape 68% of simulated strikes (McHenry MJ, Feitl  
33 KE, Strother JA and Van Trump WJ, 2009) and 70% of attempted predatory strikes by the adult  
34 zebrafish (Stewart WJ, Cardenas GS and McHenry MJ, 2013). Similar behaviour has been seen in  
35 tadpoles (Roberts A, Feetham B, Pajak M and Teare T, 2009). Ablating the hair cells with neomycin  
36 prevented escape responses in zebrafish (McHenry MJ, Feitl KE, Strother JA and Van Trump WJ,  
37 2009; Stewart WJ, Cardenas GS and McHenry MJ, 2013) and tadpoles as shown in this study. The C-  
38 start in fish is mediated by Mauthner neurons, but the directionality of this response is dependent on



1 aLLN input (Mirjany M and Faber DS, 2011). Mauthner functionality in tadpoles is uncertain, but there  
2 is suggestion for their activity (and a full C-start response) at stage 42 (Sillar KT and Robertson RM,  
3 2009). The turning in young tadpoles should involve neuronal pathways other than Mauthner neurons,  
4 as *Xenopus* tadpoles can react to water current as early as stage 31/32, coinciding with the  
5 appearance of the first neuromasts (Roberts A, Feetham B, Pajak M and Teare T, 2009). LL function in  
6 post-metamorphosis *Xenopus* changes from predator evasion to detection of prey (Claas B and Munz  
7 H, 1996), when it predares using the same inertial suction feeding mechanism it must avoid in its  
8 larval stage (Carreno CA and Nishikawa KC, 2010). Opposing hair-cell populations can detect water  
9 flow in two axes: anterior-posterior, or more rarely, dorsal-ventral (Nagiel A, Andor-Ardo D and  
10 Hudspeth AJ, 2008), allowing coding information in four directions. Precise directional information can  
11 be relayed when all afferent activities from different neuromasts in the animal body are processed in  
12 the CNS. It is likely that the use of a narrow suction nozzle in our experiments reduced the chance of  
13 a full reproduction of escape response in immobilised tadpoles as in control, although asymmetrical  
14 motor discharges were seen in most tadpoles.

15 Apart from the role in escape responses, we have revealed that activating the LL system could  
16 unexpectedly stop on-going swimming. This opposing effect on motor output depending on whether  
17 the tadpole is active or not is similar to the response reversal observed in other preparations (Chase  
18 MH and Wills N, 1979; Pearson KG and Collins DF, 1993). Such reversed response was also seen  
19 when the head skin was stimulated, which could evoke swimming at rest but terminate on-going  
20 swimming (Li WC, Zhu XY and Ritson E, 2017). It will be interesting to see if the LL system and the  
21 touch sense in the head skin share the same neuronal pathways in terminating swimming.

22 There has been significant progress on how mechanical stimuli are transduced to electrical signals in  
23 the LL afferents, especially in the posterior LL system in fish. Successful whole-cell patch-clamping  
24 has allowed the ion-channel activity and glutamate release from hair-cells to be observed *in vivo*  
25 (Ricci AJ, Bai JP, Song L, Lv C, Zenisek D and Santos-Sacchi J, 2013). Mechano-electrical transducer  
26 cation channels (Fettiplace R, 2009) on the hair-cells open or close with kinocilium deflection caused  
27 by water flow and, together with the inherent outward  $K^+$  current (Bleckmann H and Zelik R,  
28 2009; Fettiplace R, 2009; Ricci AJ, Bai JP, Song L, Lv C, Zenisek D and Santos-Sacchi J, 2013), control  
29 glutamate release from the hair-cell base (Fettiplace R, 2009; Ricci AJ, Bai JP, Song L, Lv C, Zenisek D  
30 and Santos-Sacchi J, 2013; Trapani JG and Nicolson T, 2011). The role of glutamate is supported by  
31 the necessity of vesicular glutamate transporter (VGluT3), which is exclusive to the basal region of  
32 inner ear and LL hair-cells. Zebrafish *Asteroid* mutants without VGluT exhibit no afferent LL action  
33 potentials (Obholzer N, Wolfson S, Trapani JG, Mo W, Nechiporuk A, Busch-Nentwich E, Seiler C, Sidi  
34 S, Sollner C, Duncan RN, Boehland A and Nicolson T, 2008). Afferent neurons of the LL exhibit  
35 irregular spontaneous spiking (Kroese AB, Van der Zalm JM and Van den Bercken J, 1978; Trapani JG  
36 and Nicolson T, 2011), which may result from voltage-activated calcium channel-mediated baseline  
37 release of glutamate from the hair-cells (Trapani JG and Nicolson T, 2011). Our study here also  
38 revealed spontaneous afferent activities in the tadpole aLLN. Further studies are needed to see if  
39 similar ionic mechanisms sustain these spontaneous activities.

1 In terms of LL efferents, it has been shown that both cholinergic and dopaminergic efferent neurons  
2 modulate the hair-cell output (Haehnel-Taguchi M, Akanyeti O and Liao JC, 2018). In stages 48–55  
3 tadpoles, the efferent activity was shown to be corollary to the locomotor rhythms, in phase with  
4 ipsilateral spinal central pattern generator activity and suppressing afferent sensory signalling  
5 (Chagnaud BP et al., 2015). These efferent neurons are located in the brainstem nucleus which  
6 projects to innervate both lateral line and inner ear hair cells (Hellmann B and Fritzsche B, 1996).  
7 There are some unidentified cholinergic neurons in tadpole brainstem, which are involved in  
8 termination of swimming in the concussion-like events (Li WC, Zhu XY and Ritson E, 2017). We do not  
9 know if these cholinergic neurons are also candidates of the cholinergic efferents in the tadpole LL  
10 nerves. Whilst cholinergic modulation is inhibitory (Bricaud O et al., 2001), the role of dopaminergic  
11 modulation is not understood. In stage 37/38 tadpoles, the monoaminergic systems including  
12 dopaminergic modulation are still not endogenously functional (Sillar KT et al., 2014). The efferent  
13 activity therefore unlikely represent dopaminergic modulation.

14 In fishes, afferent LL activity propagates from the peripheral end of afferents and enters the hindbrain  
15 to the caudal and medial octavolateralis nucleus (Maruska KP and Tricas TC, 2009). In adult *Xenopus*  
16 *laevis*, the aLLN projects to a longitudinally dispersed area in the brainstem which includes the LL  
17 nucleus and the medial part of the anterior nucleus (Will U et al., 1985). Similar to that in hagfish,  
18 *Xenopus* aLLN ganglion is closely attached to the trigeminal ganglion (Kishida R et al., 1987). It is not  
19 clear if the aLLN consists purely of LL sensory cells or a mixture of cutaneous sensory cells and  
20 lateral line sensory cells as in the hagfish, where projections run to both the trigeminal sensory  
21 nucleus and medial nucleus of the area acousticolateralis. Using calcium imaging, we have located a  
22 number of sensory interneurons responding to suction stimulation with short latencies. Most of these  
23 neurons are packed within the region likely corresponding to the lateral line nucleus. Even within this  
24 region, some neurons appeared to be also involved in the initiation of swimming activity whilst others  
25 only showed activity in response to suction. Future studies need to trace where these neurons project  
26 to in the central nervous system and how the LL sensory information is further processed to lead to  
27 various motor outputs including escape responses, initiation and termination of swimming and  
28 rheotaxis.

29

### 30 **Acknowledgement**

31 Valentina Saccomanno was an exchange MSc student in the University of St Andrews with a  
32 scholarship by the Erasmus+ Programme for Traineeship and the University of Trieste. Heather Love  
33 and Amy Sylvester were undergraduate neuroscience students conducting their senior honours  
34 research projects in the University of St Andrews.

35

### 36 **References**

- 1 Akanyeti O, Thornycroft PJ, Lauder GV, Yanagitsuru YR, Peterson AN, Liao JC (2016), Fish optimize
- 2 sensing and respiration during undulatory swimming. *Nat Commun* 7:11044.
- 3 Bleckmann H, Zelik R (2009), Lateral line system of fish. *Integr Zool* 4:13-25.
- 4 Bricaud O, Char V, Dambly-Chaudiere C, Ghysen A (2001), Early efferent innervation of the
- 5 zebrafish lateral line. *J Comp Neurol* 434:253-261.
- 6 Carreno CA, Nishikawa KC (2010), Aquatic feeding in pipid frogs: the use of suction for prey capture.
- 7 *J Exp Biol* 213:2001-2008.
- 8 Chagnaud BP, Banchi R, Simmers J, Straka H (2015), Spinal corollary discharge modulates motion
- 9 sensing during vertebrate locomotion. *Nat Commun* 6:7982.
- 10 Chase MH, Wills N (1979), Brain stem control of masseteric reflex activity during sleep and
- 11 wakefulness: medulla. *Exp Neurol* 64:118-131.
- 12 Claas B, Munz H (1996), Analysis of surface wave direction by the lateral line system of *Xenopus*:
- 13 source localization before and after inactivation of different parts of the lateral line. *J Comp Physiol*
- 14 *A* 178:253-268.
- 15 Coombs S, Zaidi ZH (2012) *The Mechanosensory Lateral Line: Neurobiology and Evolution*. Springer.
- 16 Corey DP, Hudspeth AJ (1983), Kinetics of the receptor current in bullfrog saccular hair cells. *J*
- 17 *Neurosci* 3:962-976.
- 18 Fettiplace R (2009), Defining features of the hair cell mechano-electrical transducer channel. *Pflugers*
- 19 *Arch* 458:1115-1123.
- 20 Glowatzki E, Fuchs PA (2002), Transmitter release at the hair cell ribbon synapse. *Nat Neurosci*
- 21 5:147-154.
- 22 Haehnel-Taguchi M, Akanyeti O, Liao JC (2018), Behavior, Electrophysiology, and Robotics
- 23 Experiments to Study Lateral Line Sensing in Fishes. *Integr Comp Biol* 58:874-883.
- 24 Hellmann B, Fritsch B (1996), Neuroanatomical and Histochemical Evidence for the Presence of
- 25 Common Lateral Line and Inner Ear Efferents and of Efferents to the Basilar Papilla in a Frog,
- 26 *Xenopus laevis*. *Brain Behav Evol* 47:185-194.
- 27 Keen EC, Hudspeth AJ (2006), Transfer characteristics of the hair cell's afferent synapse. *Proc Natl*
- 28 *Acad Sci U S A* 103:5537-5542.
- 29 Kishida R, Goris RC, Nishizawa H, Koyama H, Kadota T, Amemiya F (1987), Primary neurons of the
- 30 lateral line nerves and their central projections in hagfishes. *J Comp Neurol* 264:303-310.
- 31 Koutsikou S, Merrison-Hort R, Buhl E, Ferrario A, Li WC, Borisyuk R, Soffe SR, Roberts A (2018), A
- 32 simple decision to move in response to touch reveals basic sensory memory and mechanisms for
- 33 variable response times. *J Physiol* 596:6219-6233.
- 34 Kroese AB, Van der Zalm JM, Van den Bercken J (1978), Frequency response of the lateral-line organ
- 35 of *Xenopus laevis*. *Pflugers Arch* 375:167-175.
- 36 Li WC, Merrison-Hort R, Zhang HY, Borisyuk R (2014), The generation of antiphase oscillations and
- 37 synchrony by a rebound-based vertebrate central pattern generator. *J Neurosci* 34:6065-6077.
- 38 Li WC, Zhu XY, Ritson E (2017), Mechanosensory Stimulation Evokes Acute Concussion-Like Behavior
- 39 by Activating GIRKs Coupled to Muscarinic Receptors in a Simple Vertebrate. *eNeuro* 4.
- 40 Liao JC (2010), Organization and physiology of posterior lateral line afferent neurons in larval
- 41 zebrafish. *Biol Lett* 6:402-405.
- 42 Liao JC, Haehnel M (2012), Physiology of afferent neurons in larval zebrafish provides a functional
- 43 framework for lateral line somatotopy. *J Neurophysiol* 107:2615-2623.
- 44 Lv C, Stewart WJ, Akanyeti O, Frederick C, Zhu J, Santos-Sacchi J, Sheets L, Liao JC, et al. (2016),
- 45 Synaptic Ribbons Require Ribeye for Electron Density, Proper Synaptic Localization, and Recruitment
- 46 of Calcium Channels. *Cell Rep* 15:2784-2795.
- 47 Maruska KP, Tricas TC (2009), Central projections of octavolateralis nerves in the brain of a
- 48 soniferous damselfish (*Abudefduf abdominalis*). *J Comp Neurol* 512:628-650.
- 49 McHenry MJ, Feitl KE, Strother JA, Van Trump WJ (2009), Larval zebrafish rapidly sense the water
- 50 flow of a predator's strike. *Biol Lett* 5:477-479.

- 1 Mirjany M, Faber DS (2011), Characteristics of the anterior lateral line nerve input to the Mauthner  
2 cell. *J Exp Biol* 214:3368-3377.
- 3 Montgomery JC, Baker CF, Carton AG (1997), The lateral line can mediate rheotaxis in fish. *Nature*  
4 (London) 3:960-963.
- 5 Nagiel A, Andor-Ardo D, Hudspeth AJ (2008), Specificity of afferent synapses onto plane-polarized  
6 hair cells in the posterior lateral line of the zebrafish. *J Neurosci* 28:8442-8453.
- 7 Nieuwkoop PD, Faber J (1956) Normal tables of *Xenopus laevis* (Daudin). Amsterdam: North Holland.
- 8 Northcutt RG (1992), Distribution and innervation of lateral line organs in the axolotl. *J Comp Neurol*  
9 325:95-123.
- 10 Obholzer N, Wolfson S, Trapani JG, Mo W, Nechiporuk A, Busch-Nentwich E, Seiler C, Sidi S, et al.  
11 (2008), Vesicular glutamate transporter 3 is required for synaptic transmission in zebrafish hair cells.  
12 *J Neurosci* 28:2110-2118.
- 13 Olszewski J, Haehnel M, Taguchi M, Liao JC (2012), Zebrafish larvae exhibit rheotaxis and can escape  
14 a continuous suction source using their lateral line. *PLoS One* 7:e36661.
- 15 Olt J, Allen CE, Marcotti W (2016), In vivo physiological recording from the lateral line of juvenile  
16 zebrafish. *J Physiol* 594:5427-5438.
- 17 Oteiza P, Odstrcil I, Lauder G, Portugues R, Engert F (2017), A novel mechanism for mechanosensory-  
18 based rheotaxis in larval zebrafish. *Nature* 547:445-448.
- 19 Pearson KG, Collins DF (1993), Reversal of the influence of group Ib afferents from plantaris on  
20 activity in medial gastrocnemius muscle during locomotor activity. *J Neurophysiol* 70:1009-1017.
- 21 Pisano GC, Mason SM, Dhliwayo N, Intine RV, Sarras MP, Jr. (2014), An assay for lateral line  
22 regeneration in adult zebrafish. *J Vis Exp*.
- 23 Quinzio S, Fabrezi M (2014), The lateral line system in anuran tadpoles: neuromast morphology,  
24 arrangement, and innervation. *Anat Rec (Hoboken)* 297:1508-1522.
- 25 Raible DW, Kruse GJ (2000), Organization of the lateral line system in embryonic zebrafish. *J Comp*  
26 *Neurol* 421:189-198.
- 27 Ricci AJ, Bai JP, Song L, Lv C, Zenisek D, Santos-Sacchi J (2013), Patch-clamp recordings from lateral  
28 line neuromast hair cells of the living zebrafish. *J Neurosci* 33:3131-3134.
- 29 Roberts A, Borisjuk R, Buhl E, Ferrario A, Koutsikou S, Li WC, Soffe SR (2019), The decision to move:  
30 response times, neuronal circuits and sensory memory in a simple vertebrate. *Proc Biol Sci*  
31 286:20190297.
- 32 Roberts A, Feetham B, Pajak M, Teare T (2009), Responses of hatchling *Xenopus* tadpoles to water  
33 currents: first function of lateral line receptors without cupulae. *J Exp Biol* 212:914-921.
- 34 Roberts A, Li W-C, Soffe SR (2012), A functional scaffold of CNS neurons for the vertebrates: The  
35 developing *Xenopus laevis* spinal cord. *Dev Neurobiol* 72:575-584.
- 36 Roberts A, Li WC, Soffe SR (2010), How Neurons Generate Behavior in A Hatchling Amphibian  
37 Tadpole: An Outline. *Front Behav Neurosci* 4.
- 38 Schindelin J, Arganda-Carreras I, Frise E, Kaynig V, Longair M, Pietzsch T, Preibisch S, Rueden C, et al.  
39 (2012), Fiji: an open-source platform for biological-image analysis. *Nature methods* 9:676-682.
- 40 Schlosser G (2002), Development and evolution of lateral line placodes in amphibians. - II.  
41 Evolutionary diversification. *Zoology (Jena)* 105:177-193.
- 42 Schlosser G, Northcutt RG (2000), Development of neurogenic placodes in *Xenopus laevis*. *J Comp*  
43 *Neurol* 418:121-146.
- 44 Shelton PM (1970), The lateral line system at metamorphosis in *Xenopus laevis* (Daudin). *J Embryol*  
45 *Exp Morphol* 24:511-524.
- 46 Sillar KT, Combes D, Simmers J (2014), Neuromodulation in developing motor microcircuits. *Curr*  
47 *Opin Neurobiol* 29:73-81.
- 48 Sillar KT, Robertson RM (2009), Thermal activation of escape swimming in post-hatching *Xenopus*  
49 *laevis* frog larvae. *J Exp Biol* 212:2356-2364.

- 1 Simmons AM, Costa LM, Gerstein HB (2004), Lateral line-mediated rheotactic behavior in tadpoles of
- 2 the African clawed frog (*Xenopus laevis*). *J Comp Physiol A Neuroethol Sens Neural Behav Physiol*
- 3 190:747-758.
- 4 Stewart WJ, Cardenas GS, McHenry MJ (2013), Zebrafish larvae evade predators by sensing water
- 5 flow. *J Exp Biol* 216:388-398.
- 6 Strelhoff D, Honrubia V (1978), Neural transduction in *Xenopus laevis* lateral line system. *J*
- 7 *Neurophysiol* 41:432-444.
- 8 Suli A, Watson GM, Rubel EW, Raible DW (2012), Rheotaxis in larval zebrafish is mediated by lateral
- 9 line mechanosensory hair cells. *PLoS One* 7:e29727.
- 10 Trapani JG, Nicolson T (2011), Mechanism of spontaneous activity in afferent neurons of the
- 11 zebrafish lateral-line organ. *J Neurosci* 31:1614-1623.
- 12 Will U, Luhede G, Görner P (1985), The area octavo lateralis of *Xenopus laevis*. II. Secondary order
- 13 projections and cytoarchitecture. *Cell Tissue Res* 239.

14

15

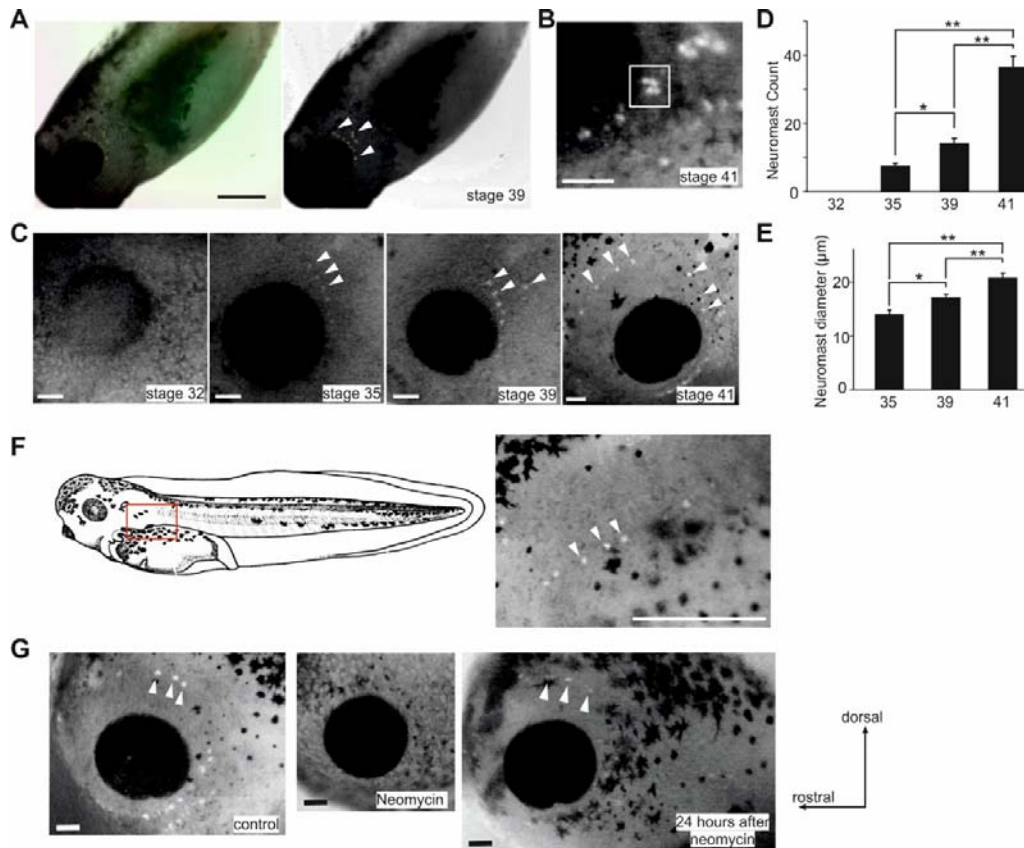

1

2 **Fig.1 Staining tadpole lateral line neuromasts using DASPEI in control and after neomycin**

3 **treatment.** **A.** Converting a colour photo of a tadpole after DASPEI staining to grey scale after

4 enhancing the red and yellow channels. **B.** Clustering of neuromasts in a stage 41 tadpole (square).

5 **C.** DASPEI staining of tadpoles at various stages (only eye region shown). **D.** Neuromast counts for

6 each side of tadpoles at stages 32, 35, 39 and 41. **E.** Neuromast diameter in stage 35, 39 and 41

7 tadpoles. **F.** The appearance of posterior LL neuromasts. Photo shows the red rectangle area in the

8 drawing on the left. **G.** DASPEI staining of stage 40 tadpoles in control, treatment with 3 μM neomycin

9 for 30 minutes and 24 hours after neomycin treatment. Orientation of the tadpoles is the same in **B,** **C**

10 and **G.** White arrow heads point at some example neuromasts labelled with DASPEI. Scale bars: 500

11 μm in **A** and **F**; 100 μm in **B,** **C** and **G.**

12

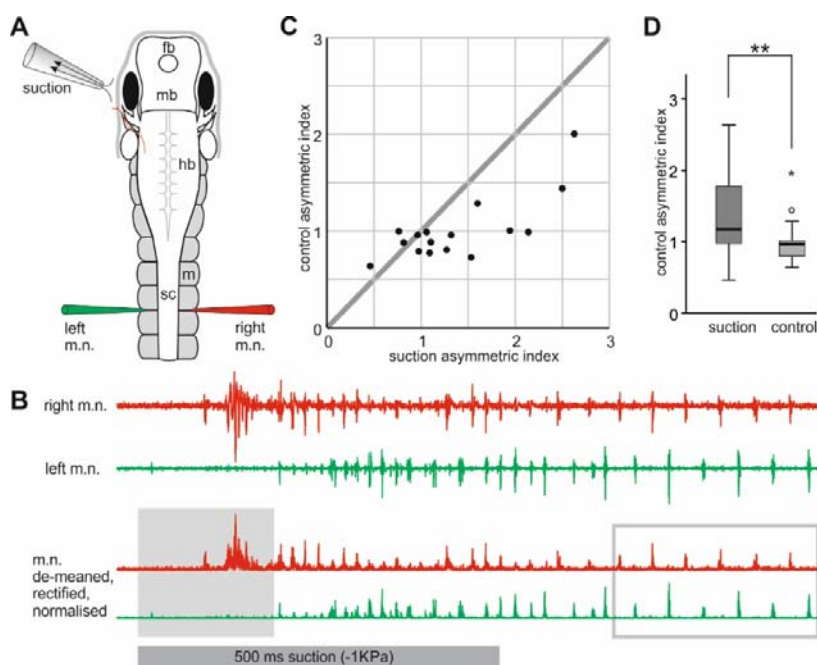

1

2 **Fig.2 Asymmetric motor responses elicited by local suction close to the left eyecup. A.**

3 Experimental setup diagram showing tadpole anatomy and the position of the suction pipette and  
4 recording electrodes. fb, forebrain; mb, midbrain; hb, hindbrain; sc, spinal cord; m, myotome. **B.** One  
5 example initial motor response elicited by a 500ms suction pulse (grey bar below) and its processing  
6 for calculating asymmetric index. Grey area includes the period of de-meaned, rectified and  
7 normalised recordings for integration. Grey rectangle encircles a few swimming cycles where m.n.  
8 bursts are used for normalising m.n. activity. Traces are color-coded to electrodes. There is a lot of  
9 synchrony (Li WC, Merrison-Hort R, Zhang HY and Borisyuk R, 2014) before swimming. **C.** The  
10 average asymmetric indices in control, spontaneous swimming is correlated with those in motor  
11 responses induced by suction. Thick grey line is the identity line. **D.** Asymmetric indices are larger in  
12 suction-evoked responses than in control. \*\* shows significance at  $p < 0.01$ .

13

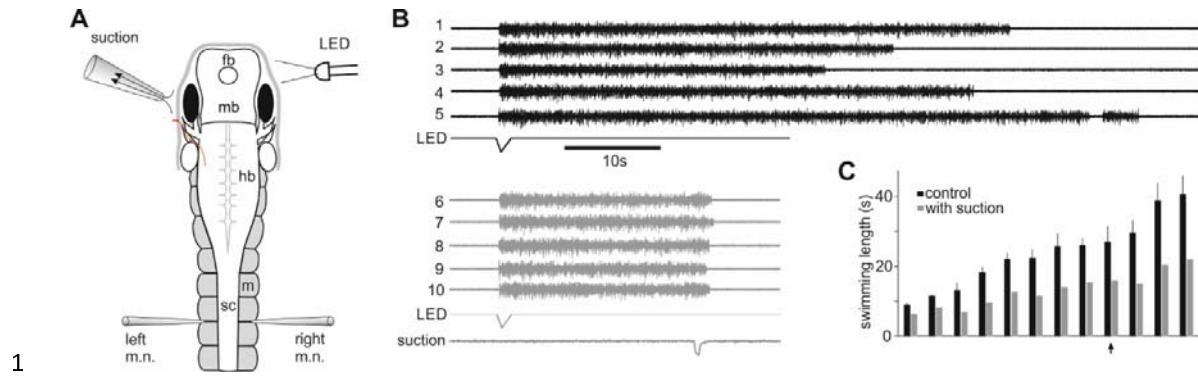

**Fig.3 Suction stops on-going swimming.** **A.** Experimental setup showing tadpole anatomy and the position of the LED light, suction pipette and recording electrodes. For abbreviations see Fig.1A. **B.** Consecutive swimming episodes initiated by dimming the LED light in control (trials 1-5) and with 500ms suction applied ~ 20 seconds into swimming (trials 6-10). Only activity from the left m.n. is shown. **C.** Summary of swimming lengths after suction in 12 individual tadpoles (all  $p < 0.01$  except  $p = 0.012$  in the tadpole with an arrow).



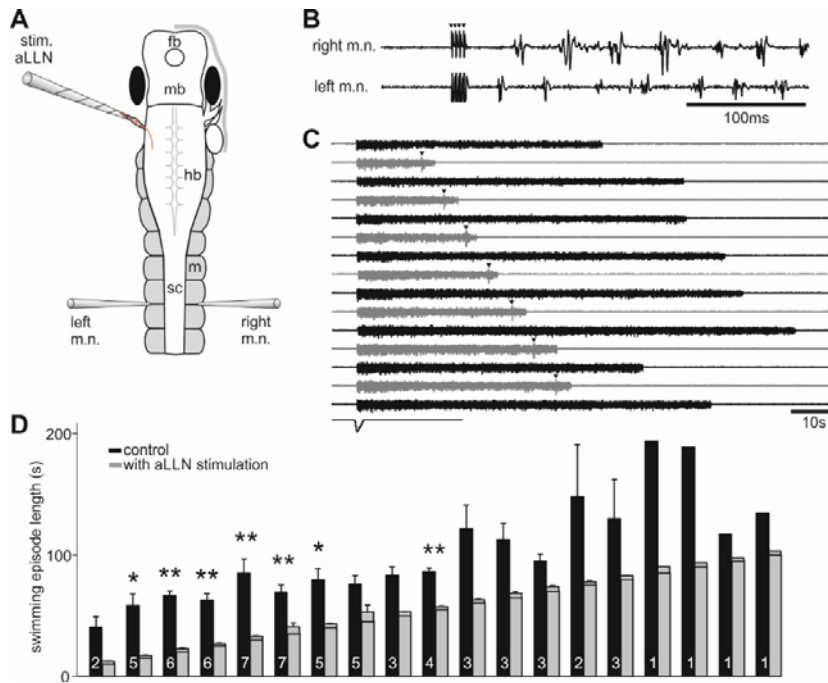

1

2 **Fig.4 Stimulating the anterior lateral line nerve (stim. aLLN) electrically does not produce clear**  
 3 **escape response but stops on-going swimming.** **A.** Experimental setup showing tadpole anatomy  
 4 and the position of the stimulation and recording electrodes. **B.** An example of stimulating aLLN  
 5 repetitively (4 x 0.5 ms pulses at 20  $\mu$ A and 200 Hz, arrow heads) not evoking prolonged escape burst  
 6 before alternating swimming bursts between the left and right m.n. recordings. **C.** Single electrical  
 7 stimulation (arrow heads) applied at various points after swimming initiation stops swimming reliably  
 8 (grey traces, black is control). **D.** Summary of electrical stimulation of aLLN at different time from the  
 9 beginning of swimming (lines within the grey bars) shortening swimming (\* indicates significance at  
 10  $p < 0.05$ , \*\* at  $p < 0.01$ , paired t-tests). Numerals inside black control bars are number of tadpoles tested  
 11 for each time point of electrical stimulation.

12

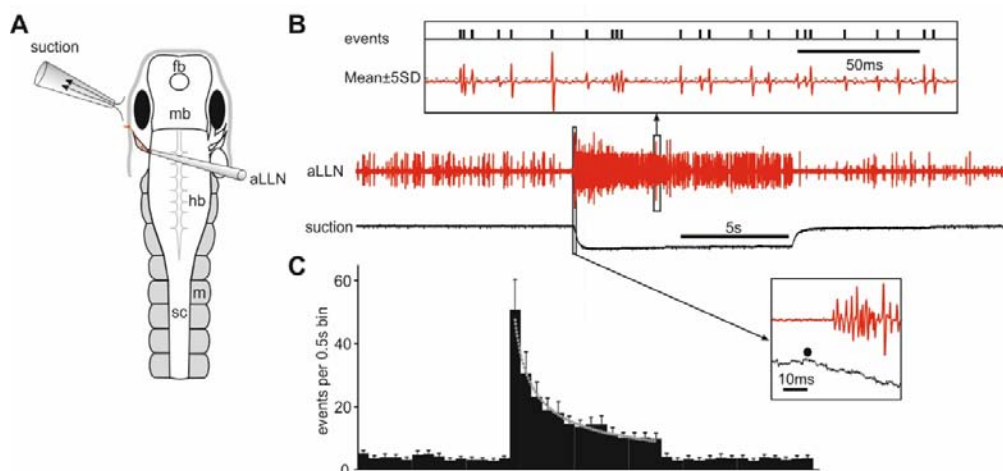

1

2 **Fig.5 aLLN afferent activities.** A. Experimental setup for recording aLLN afferent activity. The  
3 recording electrode directly sucks onto the cut end of aLLN. B. An example recording of aLLN activity  
4 around time of 10s suction (-3.3 KPa). Inset above (boxed area) shows events triggering by setting  
5 the threshold at  $\pm 5SD$  in the aLLN recording trace. Inset below shows the delay from the beginning of  
6 saline flow (dot) to first unitary discharge. C. Average binned events in 14 tadpoles showing increased  
7 activity during a 7s suction period and adaptation (bin width: 0.5s). Dotted fitting curve is for activity  
8 during suction:  $y = 47.33 X^{-0.61}$  ( $R^2 = 0.98$ ).

9

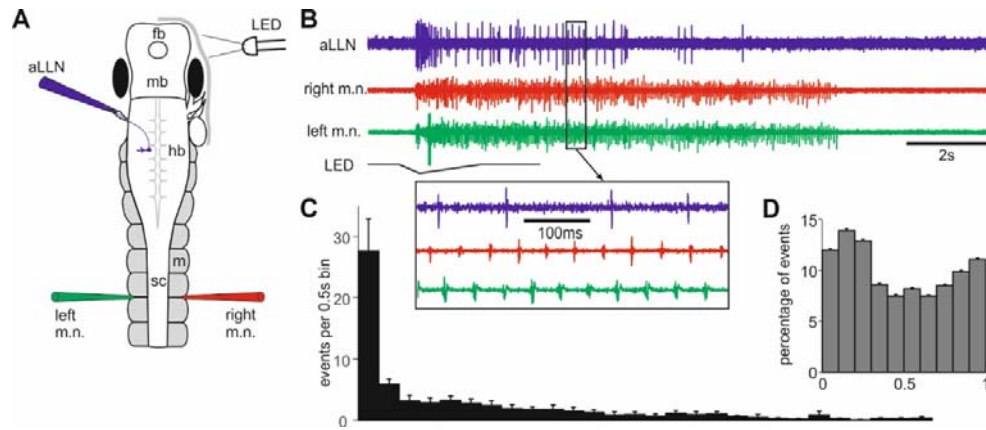

1

2 **Fig.6 aLLN efferent activities. A. Setup for recording aLLN efferent activity where swimming is**

3 **started by dimming an LED light. B. An example aLLN efferent recording during a swimming**

4 **episode. Box region is expanded to show timing of the efferent activity relative to m.n. bursts on both**

5 **sides. C. Number of unitary discharges per 0.5s bin in the first 14 seconds after swimming is started**

6 **(averaged from 3 episodes from each of 9 tadpoles). D. Phase of aLLN unitary discharges plotted**

7 **against the m.n. bursts on the ipsilateral side (100 spikes from each of 10 tadpoles).**

8

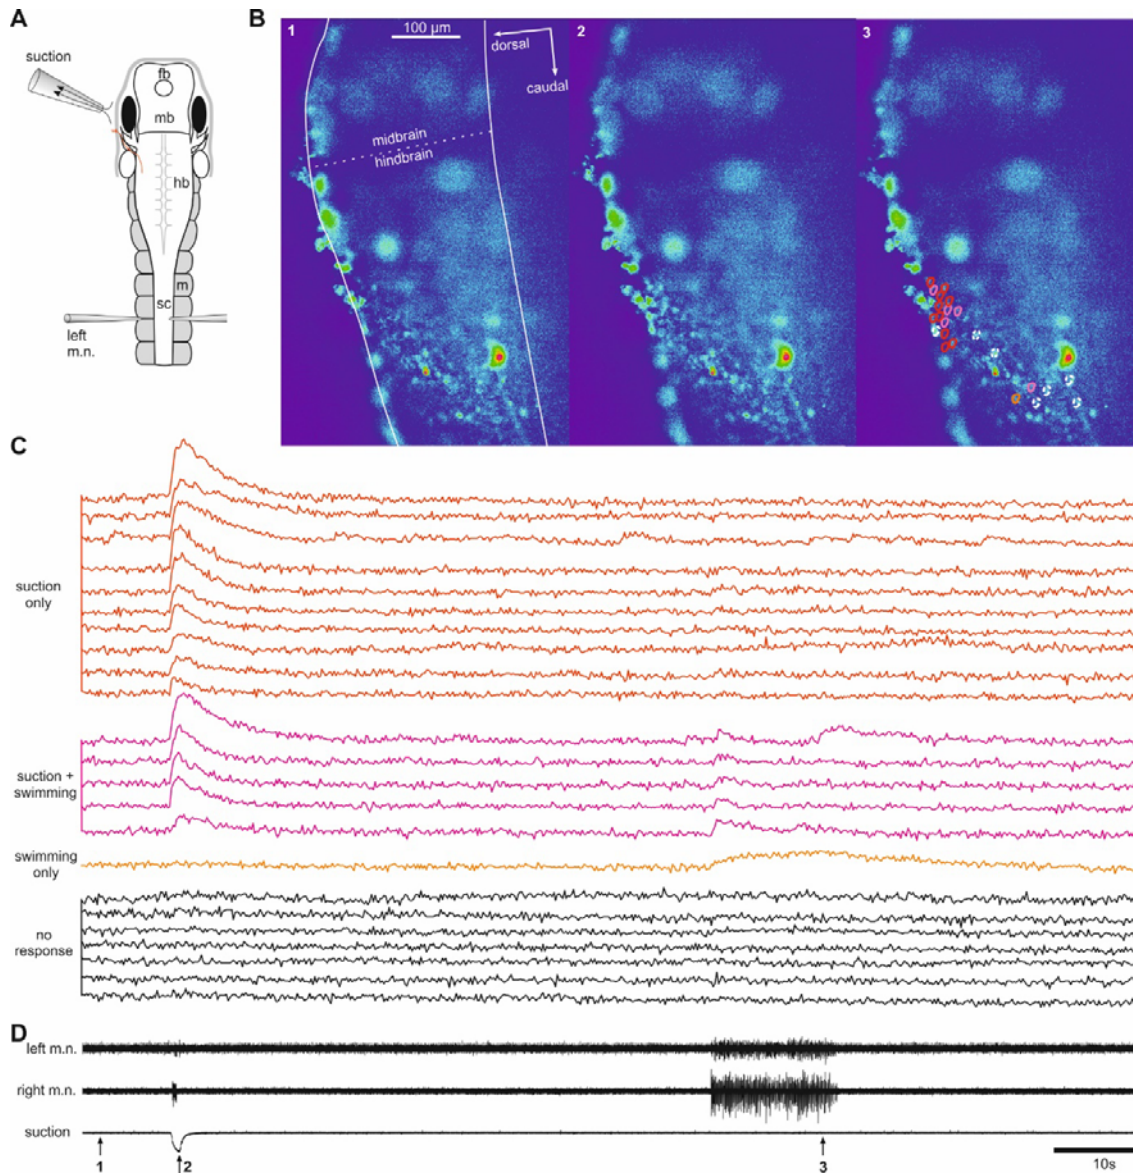

1

2 **Fig.7 Locating aLLN sensory interneurons using calcium imaging.** A. Experimental setup for  
3 calcium imaging using a x10 water immersion objective. The preparation is tilted so the left side of the  
4 hindbrain stays roughly flat to facilitate imaging many neurons in a single focal plane. Imaging is at 5  
5 Hz for 120s. B. Three frames captured at the indicated time points in D (1,2 and 3). Lines in frame 1  
6 shows the profile of the hindbrain and midbrain (border: dashed line). Circles in frame 3 indicate the  
7 location of neurons whose calcium activities are given in C. C. Calcium activity of 24 neurons outlined  
8 by circles in B (color-coded except that dashed white circles correspond to black traces). Different  
9 types of responses are grouped as labelled. D. Simultaneous m.n. and suction recordings.

10
